# Supplementary material for: Comparison of Early Contrast Enhancement Models in Ultrafast Dynamic Contrast-Enhanced Magnetic Resonance Imaging of Prostate Cancer
Source: MDPI journal article supplement (doi:10.3390/diagnostics14090870), 2024-04-23
Supplement: s1 [file s1]

**Table S1.** Post-hoc analysis of differences within PI\_RADS and prostate zone showing differences in ANOVA

| Parameter (Model)                                 | Factors   | Difference | lower 95%CI | upper 95% CI | p-value               |
|---------------------------------------------------|-----------|------------|-------------|--------------|-----------------------|
| F <sub>p</sub><br>(2CU)                           | P3-Normal | 0.3677     | -1.2193     | 1.9548       | 0.9282                |
|                                                   | P4-Normal | 1.2499     | 0.4199      | 2.0799       | 0.0010                |
|                                                   | P5-Normal | 1.8516     | 0.7734      | 2.9299       | 0.0002                |
|                                                   | P4-P3     | 0.8822     | -0.7582     | 2.5226       | 0.4929                |
|                                                   | P5-P3     | 1.4839     | -0.2950     | 3.2629       | 0.1342                |
|                                                   | P5-P4     | 0.6017     | -0.5536     | 1.7570       | 0.5204                |
|                                                   | TZ-PZ     | 0.7450     | 0.0227      | 1.4673       | 0.0434                |
| MTT <sub>p</sub><br>(2CU)                         | P3-Normal | -0.4264    | -1.0500     | 0.1971       | 0.2811                |
|                                                   | P4-Normal | -0.4775    | -0.8036     | -0.1514      | 0.0015                |
|                                                   | P5-Normal | -0.6180    | -1.0416     | -0.1945      | 0.0015                |
|                                                   | P4-P3     | -0.0510    | -0.6955     | 0.5935       | 0.9967                |
|                                                   | P5-P3     | -0.1916    | -0.8905     | 0.5073       | 0.8876                |
|                                                   | P5-P4     | -0.1406    | -0.5945     | 0.3133       | 0.8464                |
|                                                   | TZ-PZ     | -0.2030    | -0.4868     | 0.0808       | 0.1579                |
| T <sub>c</sub><br>(2CU)                           | P3-Normal | -0.4542    | -1.1186     | 0.2101       | 0.2813                |
|                                                   | P4-Normal | -0.4985    | -0.8459     | -0.1510      | 0.0019                |
|                                                   | P5-Normal | -0.6670    | -1.1183     | -0.2157      | 0.0013                |
|                                                   | P4-P3     | -0.0442    | -0.7309     | 0.6424       | 0.9982                |
|                                                   | P5-P3     | -0.2128    | -0.9574     | 0.5319       | 0.8749                |
|                                                   | P5-P4     | -0.1685    | -0.6522     | 0.3151       | 0.7948                |
|                                                   | TZ-PZ     | -0.2360    | -0.5384     | 0.0663       | 0.1238                |
| $\alpha$<br>(Exponential EMM)                     | P3-Normal | 0.0157     | -0.0499     | 0.0812       | 0.9218                |
|                                                   | P4-Normal | 0.0675     | 0.0332      | 0.1017       | 1.3x10 <sup>-5</sup>  |
|                                                   | P5-Normal | 0.0899     | 0.0454      | 0.1344       | 8.0x10 <sup>-6</sup>  |
|                                                   | P4-P3     | 0.0518     | -0.0160     | 0.1195       | 0.1929                |
|                                                   | P5-P3     | 0.0742     | 0.0008      | 0.1477       | 0.0468                |
|                                                   | P5-P4     | 0.0224     | -0.0253     | 0.0701       | 0.6041                |
|                                                   | TZ-PZ     | 0.0464     | 0.0166      | 0.0762       | 0.0028                |
| A <sub>1</sub> -T <sub>0</sub><br>(Sigmoidal EMM) | P3-Normal | -6.3268    | -13.9347    | 1.2811       | 0.1361                |
|                                                   | P4-Normal | -7.8307    | -11.8094    | -3.8519      | 1.32x10 <sup>-5</sup> |
|                                                   | P5-Normal | -7.6588    | -12.8274    | -2.4903      | 1.26x10 <sup>-3</sup> |
|                                                   | P4-P3     | -1.5039    | -9.3676     | 6.3598       | 0.9578                |
|                                                   | P5-P3     | -1.3321    | -9.8597     | 7.1956       | 0.9762                |
|                                                   | P5-P4     | 0.1718     | -5.3663     | 5.7100       | 0.9998                |
|                                                   | TZ-PZ     | -3.8757    | -7.3381     | 0.4133       | 0.02883               |
| A <sub>2</sub><br>(Sigmoidal EMM)                 | P3-Normal | -6.0319    | -13.3057    | 1.2420       | 0.1378                |
|                                                   | P4-Normal | -7.6446    | -11.4486    | -3.8405      | 8.8x10 <sup>-6</sup>  |
|                                                   | P5-Normal | -6.7672    | -11.7088    | -1.8256      | 0.0033                |
|                                                   | P4-P3     | -1.6127    | -9.1311     | 5.9057       | 0.9419                |
|                                                   | P5-P3     | -0.7354    | -8.8886     | 7.4179       | 0.9952                |
|                                                   | P5-P4     | 0.8773     | -4.4177     | 6.1724       | 0.9719                |
|                                                   | TZ-PZ     | -3.5725    | -6.8828     | -0.2621      | 0.0349                |
| TTP                                               | P3-Normal | -1.7669    | -30.3493    | 26.8156      | 0.9984                |
|                                                   | P4-Normal | -29.0135   | -43.9614    | -14.0655     | 1.73x10 <sup>-5</sup> |
|                                                   | P5-Normal | -36.7717   | -56.1896    | -17.3537     | 2.76x10 <sup>-5</sup> |
|                                                   | P4-P3     | -27.2466   | -56.7901    | 2.2969       | 0.0811                |
|                                                   | P5-P3     | -35.0048   | -67.0428    | -2.9668      | 0.0269                |
|                                                   | P5-P4     | -7.7582    | -28.5649    | 13.0485      | 0.7595                |
|                                                   | TZ-PZ     | -3.3312    | -16.3393    | 9.6769       | 0.6108                |

**Table S2.** Post-hoc analysis of differences within Grade Group following one-way ANOVA

| Parameter (Model)         | Factors                         | Difference | lower 95%CI | upper 95% CI | p-value |
|---------------------------|---------------------------------|------------|-------------|--------------|---------|
| F <sub>p</sub><br>(2CU)   | GG 1 vs -ve or Normal-appearing | 1.096      | -0.352      | 2.545        | 0.22006 |
|                           | GG 2 vs -ve or Normal-appearing | 1.329      | 0.144       | 2.515        | 0.02064 |
|                           | GG 3 vs -ve or Normal-appearing | 1.932      | 0.331       | 3.532        | 0.01056 |
|                           | GG 4 vs -ve or Normal-appearing | 2.017      | 0.417       | 3.617        | 0.00683 |
|                           | GG 2 vs GG 1                    | 0.233      | -1.500      | 1.966        | 0.99544 |
|                           | GG 3 vs GG 1                    | 0.835      | -1.204      | 2.875        | 0.77563 |
|                           | GG 4 vs GG 1                    | 0.921      | -1.119      | 2.960        | 0.70761 |
|                           | GG 3 vs GG 2                    | 0.602      | -1.260      | 2.464        | 0.89059 |
|                           | GG 4 vs GG 2                    | 0.687      | -1.174      | 2.549        | 0.83434 |
|                           | GG 4 vs GG 3                    | 0.085      | -2.064      | 2.235        | 0.99996 |
| MTT <sub>p</sub><br>(2CU) | GG 1 vs -ve or Normal-appearing | -0.600     | -1.208      | 0.007        | 0.05411 |
|                           | GG 2 vs -ve or Normal-appearing | -0.428     | -0.925      | 0.069        | 0.12214 |
|                           | GG 3 vs -ve or Normal-appearing | -0.617     | -1.288      | 0.054        | 0.08542 |
|                           | GG 4 vs -ve or Normal-appearing | -0.582     | -1.253      | 0.088        | 0.11772 |
|                           | GG 2 vs GG 1                    | 0.172      | -0.555      | 0.899        | 0.96233 |
|                           | GG 3 vs GG 1                    | -0.017     | -0.872      | 0.838        | 1.00000 |
|                           | GG 4 vs GG 1                    | 0.018      | -0.837      | 0.873        | 1.00000 |
|                           | GG 3 vs GG 2                    | -0.189     | -0.969      | 0.592        | 0.95945 |
|                           | GG 4 vs GG 2                    | -0.154     | -0.935      | 0.627        | 0.98057 |
|                           | GG 4 vs GG 3                    | 0.035      | -0.867      | 0.936        | 0.99997 |
| T <sub>c</sub><br>(2CU)   | GG 1 vs -ve or Normal-appearing | -0.631     | -1.277      | 0.015        | 0.05851 |
|                           | GG 2 vs -ve or Normal-appearing | -0.467     | -0.996      | 0.061        | 0.10651 |
|                           | GG 3 vs -ve or Normal-appearing | -0.672     | -1.385      | 0.041        | 0.07397 |
|                           | GG 4 vs -ve or Normal-appearing | -0.627     | -1.340      | 0.087        | 0.11049 |
|                           | GG 2 vs GG 1                    | 0.164      | -0.609      | 0.936        | 0.97484 |
|                           | GG 3 vs GG 1                    | -0.041     | -0.950      | 0.868        | 0.99994 |
|                           | GG 4 vs GG 1                    | 0.004      | -0.905      | 0.913        | 1.00000 |
|                           | GG 3 vs GG 2                    | -0.204     | -1.034      | 0.626        | 0.95656 |
|                           | GG 1 vs -ve or Normal-appearing | -0.159     | -0.989      | 0.671        | 0.98246 |
|                           | GG 2 vs -ve or Normal-appearing | 0.045      | -0.913      | 1.004        | 0.99993 |
| E<br>(2CU)                | GG 1 vs -ve or Normal-appearing | -0.00681   | -0.04878    | 0.03515      | 0.99064 |
|                           | GG 2 vs -ve or Normal-appearing | -0.02546   | -0.05980    | 0.00888      | 0.23804 |
|                           | GG 3 vs -ve or Normal-appearing | -0.03603   | -0.08239    | 0.01033      | 0.19764 |
|                           | GG 4 vs -ve or Normal-appearing | -0.03551   | -0.08187    | 0.01085      | 0.20964 |
|                           | GG 2 vs GG 1                    | -0.01865   | -0.06886    | 0.03157      | 0.83143 |
|                           | GG 3 vs GG 1                    | -0.02921   | -0.08830    | 0.02987      | 0.63273 |
|                           | GG 4 vs GG 1                    | -0.02870   | -0.08778    | 0.03039      | 0.64818 |
|                           | GG 3 vs GG 2                    | -0.01057   | -0.06450    | 0.04337      | 0.98107 |
|                           | GG 1 vs -ve or Normal-appearing | -0.01005   | -0.06399    | 0.04389      | 0.98428 |
|                           | GG 2 vs -ve or Normal-appearing | 0.00052    | -0.06176    | 0.06280      | 0.99999 |

**Table S2 - continued.** Post-hoc analysis of differences within Grade Group following one-way ANOVA

|                                                    | Factors                         | Difference | lower 95%CI | upper 95% CI | p-value |
|----------------------------------------------------|---------------------------------|------------|-------------|--------------|---------|
| $\alpha$<br>(exponential EMM)                      | GG 1 vs -ve or Normal-appearing | 0.0728     | 0.0137      | 0.1320       | 0.00866 |
|                                                    | GG 2 vs -ve or Normal-appearing | 0.0580     | 0.0096      | 0.1063       | 0.01141 |
|                                                    | GG 3 vs -ve or Normal-appearing | 0.0689     | 0.0035      | 0.1342       | 0.03413 |
|                                                    | GG 4 vs -ve or Normal-appearing | 0.0769     | 0.0116      | 0.1422       | 0.01340 |
|                                                    | GG 2 vs GG 1                    | -0.0149    | -0.0857     | 0.0559       | 0.97540 |
|                                                    | GG 3 vs GG 1                    | -0.0040    | -0.0873     | 0.0793       | 0.99992 |
|                                                    | GG 4 vs GG 1                    | 0.0041     | -0.0792     | 0.0873       | 0.99992 |
|                                                    | GG 3 vs GG 2                    | 0.0109     | -0.0651     | 0.0869       | 0.99416 |
|                                                    | GG 4 vs GG 2                    | 0.0190     | -0.0571     | 0.0950       | 0.95462 |
|                                                    | GG 4 vs GG 3                    | 0.0081     | -0.0797     | 0.0958       | 0.99898 |
| A <sub>1</sub> – T <sub>0</sub><br>(sigmoidal EMM) | GG 1 vs -ve or Normal-appearing | -3.973     | -12.262     | 4.316        | 0.65939 |
|                                                    | GG 2 vs -ve or Normal-appearing | -5.809     | -12.592     | 0.974        | 0.12632 |
|                                                    | GG 3 vs -ve or Normal-appearing | -8.390     | -17.546     | 0.766        | 0.08728 |
|                                                    | GG 4-0 -ve or Normal-appearing  | -7.765     | -16.922     | 1.391        | 0.13266 |
|                                                    | GG 2 vs GG 1                    | -1.835     | -11.753     | 8.082        | 0.98468 |
|                                                    | GG 3 vs GG 1                    | -4.417     | -16.087     | 7.253        | 0.82158 |
|                                                    | GG 4 vs GG 1                    | -3.792     | -15.462     | 7.878        | 0.88886 |
|                                                    | GG 3 vs GG 2                    | -2.581     | -13.234     | 8.072        | 0.95903 |
|                                                    | GG 4 vs GG 2                    | -1.957     | -12.610     | 8.696        | 0.98511 |
|                                                    | GG 4 vs GG 3                    | 0.625      | -11.677     | 12.926       | 0.99990 |
| A <sub>2</sub><br>(sigmoidal EMM)                  | GG 1 vs -ve or Normal-appearing | -2.827     | -10.635     | 4.981        | 0.84386 |
|                                                    | GG 2 vs -ve or Normal-appearing | -5.742     | -12.132     | 0.647        | 0.09753 |
|                                                    | GG 3 vs -ve or Normal-appearing | -7.853     | -16.478     | 0.772        | 0.09057 |
|                                                    | GG 4 vs -ve or Normal-appearing | -7.755     | -16.380     | 0.870        | 0.09730 |
|                                                    | GG 2 vs GG 1                    | -2.915     | -12.257     | 6.427        | 0.90259 |
|                                                    | GG 3 vs GG 1                    | -5.026     | -16.019     | 5.967        | 0.69780 |
|                                                    | GG 4 vs GG 1                    | -4.928     | -15.921     | 6.065        | 0.71294 |
|                                                    | GG 3 vs GG 2                    | -2.111     | -12.146     | 7.925        | 0.97542 |
|                                                    | GG 4 vs GG 2                    | -2.013     | -12.048     | 8.023        | 0.97936 |
|                                                    | GG 4 vs GG 3                    | 0.098      | -11.490     | 11.686       | 0.99999 |
| TTP                                                | GG 1 vs -ve or Normal-appearing | -33.491    | -58.461     | -8.522       | 0.00344 |
|                                                    | GG 2 vs -ve or Normal-appearing | -21.986    | -42.419     | -1.553       | 0.02903 |
|                                                    | GG 3 vs -ve or Normal-appearing | -36.059    | -63.641     | -8.476       | 0.00460 |
|                                                    | GG 4-0 -ve or Normal-appearing  | -39.026    | -66.608     | -11.443      | 0.00181 |
|                                                    | GG 2 vs GG 1                    | 11.505     | -18.370     | 41.381       | 0.81215 |
|                                                    | GG 3 vs GG 1                    | -2.567     | -37.721     | 32.587       | 0.99958 |
|                                                    | GG 4 vs GG 1                    | -5.534     | -40.688     | 29.620       | 0.99168 |
|                                                    | GG 3 vs GG 2                    | -14.072    | -46.164     | 18.019       | 0.72920 |
|                                                    | GG 4 vs GG 2                    | -17.039    | -49.131     | 15.052       | 0.56744 |
|                                                    | GG 4 vs GG 3                    | -2.967     | -40.023     | 34.089       | 0.99940 |
